# Supplementary material for: Global burden of cancer among women of child-bearing age from 1990 to 2021: insights from the Global Burden of Disease Study 2021
Source: Research Square preprint supplement (doi:10.21203/rs.3.rs-6089535/v1), 2025-03-03
Supplement: Supplementary file 1 [file 2bd42370576261b1fe54455b.docx]

**Table S2.** Global disability-adjusted life years for 30 cancers among women of child-bearing age in 1990 and 2021, and the trends from 1990 to 2021.

| **Cancer type** | **Number of cases, 1990 (95% UI)** | **Number of cases, 2021 (95% UI)** | **Percentage change (%)** | **Rate per 100,000 people, 1990 (95% UI)** | **Rate per 100,000 people, 2021 (95% UI)** | **EAPC (95% CI)** |
| --- | --- | --- | --- | --- | --- | --- |
| **Breast cancer** | 3992794.45 (3744653.89 to 4279173.95) | 6659459.91 (6192225.91 to 7145548.78) | 0.67 | 298.56 (280 to 319.97) | 341.71 (317.74 to 366.65) | 0.22 (0.13 to 0.32) |
| **Cervical cancer** | 3509983.99 (3192517.32 to 3843598.55) | 4184314.17 (3779640.69 to 4629604.57) | 0.19 | 262.46 (238.72 to 287.4) | 214.71 (193.94 to 237.56) | -0.74 (-0.81 to -0.67) |
| **Ovarian cancer** | 799648.14 (674906.17 to 931352.29) | 1294995.57 (1139826.54 to 1431298.31) | 0.62 | 59.79 (50.47 to 69.64) | 66.45 (58.49 to 73.44) | 0.17 (0.1 to 0.24) |
| **Colon and rectum cancer** | 1368663.91 (1215858.03 to 1533020.01) | 1615410.06 (1475901.95 to 1767273.13) | 0.18 | 102.34 (90.91 to 114.63) | 82.89 (75.73 to 90.68) | -0.87 (-0.96 to -0.78) |
| **Thyroid cancer** | 127691.83 (107124.03 to 154938.95) | 206508.05 (165744.83 to 263976.58) | 0.62 | 9.55 (8.01 to 11.59) | 10.6 (8.5 to 13.55) | 0.25 (0.21 to 0.3) |
| **Uterine cancer** | 291859.51 (217419.83 to 340389.05) | 373681.68 (308997.32 to 423440.74) | 0.28 | 21.82 (16.26 to 25.45) | 19.17 (15.86 to 21.73) | -0.61 (-0.74 to -0.49) |
| **Tracheal, bronchus, and lung cancer** | 1280027.08 (1154305.29 to 1430377.87) | 1671409.09 (1483165.02 to 1898094.75) | 0.31 | 95.71 (86.31 to 106.96) | 85.76 (76.1 to 97.4) | -0.58 (-0.77 to -0.39) |
| **Brain and central nervous system cancer** | 862791.45 (715469.04 to 1020923.9) | 1223893.61 (1078670.5 to 1378555.61) | 0.42 | 64.51 (53.5 to 76.34) | 62.8 (55.35 to 70.74) | -0.17 (-0.23 to -0.11) |
| **Stomach cancer** | 2049462.33 (1825832.83 to 2288280.19) | 1447832.79 (1301321.23 to 1605517.36) | -0.29 | 153.25 (136.52 to 171.1) | 74.29 (66.77 to 82.38) | -2.51 (-2.59 to -2.43) |
| **Non-Hodgkin lymphoma** | 589783.54 (519626.29 to 673212.71) | 833080.6 (729745.39 to 939674.23) | 0.41 | 44.1 (38.85 to 50.34) | 42.75 (37.44 to 48.22) | -0.38 (-0.5 to -0.27) |
| **Leukemia** | 1783898.47 (1376825.66 to 2064452.67) | 1651008.02 (1286078.77 to 1837121.52) | -0.07 | 133.39 (102.95 to 154.37) | 84.72 (65.99 to 94.27) | -1.55 (-1.62 to -1.48) |
| **Malignant skin melanoma** | 193545.55 (167069.87 to 216744.49) | 226536.01 (174755 to 280583.24) | 0.17 | 14.47 (12.49 to 16.21) | 11.62 (8.97 to 14.4) | -0.83 (-0.93 to -0.72) |
| **Lip and oral cavity cancer** | 265615.33 (245610.32 to 290257.34) | 506379.19 (434422.76 to 588812.76) | 0.91 | 19.86 (18.37 to 21.7) | 25.98 (22.29 to 30.21) | 0.69 (0.57 to 0.8) |
| **Kidney cancer** | 119614.94 (112232.74 to 128137.44) | 162226.42 (149278.22 to 176346.34) | 0.36 | 8.94 (8.39 to 9.58) | 8.32 (7.66 to 9.05) | -0.31 (-0.4 to -0.22) |
| **Liver cancer** | 525995.52 (450723.29 to 605852.47) | 647956.12 (582242.93 to 722083.26) | 0.23 | 39.33 (33.7 to 45.3) | 33.25 (29.88 to 37.05) | -0.84 (-1.02 to -0.67) |
| **Hodgkin lymphoma** | 302224.21 (205205.88 to 365142.83) | 271717.3 (175786.19 to 354446.25) | -0.1 | 22.6 (15.34 to 27.3) | 13.94 (9.02 to 18.19) | -1.76 (-1.83 to -1.69) |
| **Nasopharynx cancer** | 354636.6 (300068 to 407744.15) | 271323.11 (240145.21 to 314908.39) | -0.23 | 26.52 (22.44 to 30.49) | 13.92 (12.32 to 16.16) | -2.5 (-2.71 to -2.29) |
| **Malignant neoplasm of bone and articular cartilage** | 314468.6 (258261.47 to 427487.79) | 436204.87 (368870.69 to 533957.95) | 0.39 | 23.51 (19.31 to 31.97) | 22.38 (18.93 to 27.4) | -0.22 (-0.34 to -0.1) |
| **Soft tissue and other extraosseous sarcomas** | 226306.15 (169751.83 to 273368.54) | 273156.8 (231368.35 to 356891.66) | 0.21 | 16.92 (12.69 to 20.44) | 14.02 (11.87 to 18.31) | -0.87 (-0.97 to -0.77) |
| **Pancreatic cancer** | 272728.74 (248703.34 to 302154.13) | 417144.92 (380539.59 to 452562.61) | 0.53 | 20.39 (18.6 to 22.59) | 21.4 (19.53 to 23.22) | 0.05 (-0.03 to 0.12) |
| **Esophageal cancer** | 381249.94 (259383.68 to 436640.24) | 367041.38 (310728.06 to 441179.9) | -0.04 | 28.51 (19.4 to 32.65) | 18.83 (15.94 to 22.64) | -1.77 (-1.94 to -1.6) |
| **Bladder cancer** | 81652.68 (70892.72 to 92377.65) | 93506.96 (84092.15 to 104198.69) | 0.15 | 6.11 (5.3 to 6.91) | 4.8 (4.31 to 5.35) | -1.06 (-1.16 to -0.96) |
| **Gallbladder and biliary tract cancer** | 180179.94 (138797.62 to 216793.02) | 224766.69 (171228.34 to 277106.39) | 0.25 | 13.47 (10.38 to 16.21) | 11.53 (8.79 to 14.22) | -0.64 (-0.7 to -0.59) |
| **Other pharynx cancer** | 69455.02 (53372.44 to 84939.7) | 130775.84 (105870.74 to 165469.01) | 0.88 | 5.19 (3.99 to 6.35) | 6.71 (5.43 to 8.49) | 0.8 (0.73 to 0.88) |
| **Multiple myeloma** | 56526.71 (46655.84 to 71991.09) | 119971.09 (88157.39 to 145992.95) | 1.12 | 4.23 (3.49 to 5.38) | 6.16 (4.52 to 7.49) | 0.97 (0.81 to 1.13) |
| **Eye cancer** | 20629.84 (14957.1 to 24949.01) | 37048.32 (26020.11 to 54729.75) | 0.8 | 1.54 (1.12 to 1.87) | 1.9 (1.34 to 2.81) | 0.58 (0.49 to 0.67) |
| **Larynx cancer** | 66765.95 (43768.38 to 78152.39) | 89083.79 (71374.55 to 110402.37) | 0.33 | 4.99 (3.27 to 5.84) | 4.57 (3.66 to 5.66) | -0.49 (-0.56 to -0.42) |
| **Mesothelioma** | 26664.1 (23056.65 to 37719.38) | 47440.32 (42029.05 to 54601.88) | 0.78 | 1.99 (1.72 to 2.82) | 2.43 (2.16 to 2.8) | 0.55 (0.47 to 0.63) |
| **Neuroblastoma and other peripheral nervous cell tumors** | 12175.08 (9377.7 to 15643.53) | 26696.48 (21151.33 to 32700.14) | 1.19 | 0.91 (0.7 to 1.17) | 1.37 (1.09 to 1.68) | 1.2 (1.03 to 1.37) |
| **Other malignant neoplasms** | 675967.27 (510912.16 to 804506.67) | 779391.82 (675303.73 to 914515.57) | 0.15 | 50.54 (38.2 to 60.16) | 39.99 (34.65 to 46.93) | -0.94 (-1.08 to -0.8) |

UI: uncertainty intervals. EAPC: estimated annual percentage change.
