# Supplementary material for: Global burden of cancer among women of child-bearing age from 1990 to 2021: insights from the Global Burden of Disease Study 2021
Source: Research Square preprint supplement (doi:10.21203/rs.3.rs-6089535/v1), 2025-03-03
Supplement: Supplementary file 2 [file d45bea83107220fc44007e61.docx]

**Table S1.** Global prevalence for 30 cancers among women of child-bearing age in 1990 and 2021, and the trends from 1990 to 2021.

| **Cancer type** | **Number of cases, 1990 (95% UI)** | **Number of cases, 2021 (95% UI)** | **Percentage change (%)** | **Rate per 100,000 people, 1990 (95% UI)** | **Rate per 100,000 people, 2021 (95% UI)** | **EAPC (95% CI)** |
| --- | --- | --- | --- | --- | --- | --- |
| **Breast cancer** | 2170812.47 (2073352.11 to 2282935.65) | 4804868.66 (4488173.55 to 5163163.55) | 1.21 | 162.32 (155.03 to 170.7) | 246.55 (230.3 to 264.93) | 1.22 (1.15 to 1.3) |
| **Cervical cancer** | 1225545.17 (1153059.42 to 1302244.46) | 2046773 (1878007.34 to 2230735.17) | 0.67 | 91.64 (86.22 to 97.37) | 105.02 (96.36 to 114.46) | 0.45 (0.38 to 0.51) |
| **Ovarian cancer** | 281267.05 (238552.44 to 325465.42) | 522318.7 (458299.87 to 579937.15) | 0.86 | 21.03 (17.84 to 24.34) | 26.8 (23.52 to 29.76) | 0.65 (0.58 to 0.72) |
| **Colon and rectum cancer** | 270244.51 (249294.73 to 291296.34) | 538786.63 (492036.32 to 591351.92) | 0.99 | 20.21 (18.64 to 21.78) | 27.65 (25.25 to 30.34) | 0.99 (0.92 to 1.05) |
| **Thyroid cancer** | 235218.54 (210916.53 to 267521.45) | 611350.94 (517374.08 to 740228.12) | 1.6 | 17.59 (15.77 to 20) | 31.37 (26.55 to 37.98) | 1.92 (1.78 to 2.06) |
| **Uterine cancer** | 222461.81 (185969.14 to 244889.82) | 483867.67 (417893.92 to 537122.07) | 1.18 | 16.63 (13.91 to 18.31) | 24.83 (21.44 to 27.56) | 1.26 (1.11 to 1.41) |
| **Tracheal, bronchus, and lung cancer** | 55273.61 (50542.82 to 60850.73) | 96414.39 (85314.25 to 109215.46) | 0.74 | 4.13 (3.78 to 4.55) | 4.95 (4.38 to 5.6) | 0.49 (0.23 to 0.75) |
| **Brain and central nervous system cancer** | 83273.75 (73162.94 to 92277.1) | 189350.91 (166660.98 to 222042.92) | 1.27 | 6.23 (5.47 to 6.9) | 9.72 (8.55 to 11.39) | 1.58 (1.49 to 1.66) |
| **Stomach cancer** | 122652.64 (111270.89 to 135134.7) | 109786.18 (98193.46 to 124885.35) | -0.1 | 9.17 (8.32 to 10.1) | 5.63 (5.04 to 6.41) | -1.6 (-1.66 to -1.55) |
| **Non-Hodgkin lymphoma** | 123534.38 (115616.85 to 131852.22) | 274027.11 (248059.13 to 300411.06) | 1.22 | 9.24 (8.65 to 9.86) | 14.06 (12.73 to 15.41) | 0.99 (0.8 to 1.18) |
| **Leukemia** | 94932.91 (75876.38 to 109708.79) | 141936.37 (104825.15 to 165916.18) | 0.5 | 7.1 (5.67 to 8.2) | 7.28 (5.38 to 8.51) | 0.14 (0 to 0.27) |
| **Malignant skin melanoma** | 203951.18 (197543.26 to 209657.15) | 319617.78 (290580.15 to 344381.17) | 0.57 | 15.25 (14.77 to 15.68) | 16.4 (14.91 to 17.67) | 0.24 (-0.07 to 0.55) |
| **Lip and oral cavity cancer** | 55950.38 (52929.49 to 59600.41) | 144242.17 (129531.84 to 162515.6) | 1.58 | 4.18 (3.96 to 4.46) | 7.4 (6.65 to 8.34) | 1.71 (1.62 to 1.8) |
| **Kidney cancer** | 65469.73 (62581.33 to 68414.38) | 132695.04 (123254.55 to 144252.84) | 1.03 | 4.9 (4.68 to 5.12) | 6.81 (6.32 to 7.4) | 1.06 (0.9 to 1.23) |
| **Liver cancer** | 18033.36 (15495.48 to 20729.08) | 27907.44 (24976.13 to 31400.25) | 0.55 | 1.35 (1.16 to 1.55) | 1.43 (1.28 to 1.61) | -0.04 (-0.19 to 0.11) |
| **Hodgkin lymphoma** | 85836.66 (76599.43 to 91560.29) | 97176.92 (79333.38 to 112026.84) | 0.13 | 6.42 (5.73 to 6.85) | 4.99 (4.07 to 5.75) | -0.89 (-1.05 to -0.73) |
| **Nasopharynx cancer** | 43266.37 (36381.61 to 50066.56) | 70700.73 (58737.98 to 86755.88) | 0.63 | 3.24 (2.72 to 3.74) | 3.63 (3.01 to 4.45) | 0.14 (-0.02 to 0.3) |
| **Malignant neoplasm of bone and articular cartilage** | 48918.72 (41492.41 to 64236.69) | 80863.36 (69031.25 to 95223.68) | 0.65 | 3.66 (3.1 to 4.8) | 4.15 (3.54 to 4.89) | 0.42 (0.31 to 0.54) |
| **Soft tissue and other extraosseous sarcomas** | 44387.3 (35085.6 to 53473.39) | 63548.39 (55223.72 to 81336.45) | 0.43 | 3.32 (2.62 to 4) | 3.26 (2.83 to 4.17) | -0.28 (-0.38 to -0.18) |
| **Pancreatic cancer** | 8313.98 (7670.72 to 9139.57) | 14736.11 (13577.06 to 15836.49) | 0.77 | 0.62 (0.57 to 0.68) | 0.76 (0.7 to 0.81) | 0.63 (0.51 to 0.76) |
| **Esophageal cancer** | 22073.41 (14825.38 to 25480.11) | 28508.18 (23930.55 to 33487.77) | 0.29 | 1.65 (1.11 to 1.91) | 1.46 (1.23 to 1.72) | -0.75 (-0.95 to -0.55) |
| **Bladder cancer** | 35866.7 (32398.67 to 39035.96) | 58949.36 (53822.34 to 65496) | 0.64 | 2.68 (2.42 to 2.92) | 3.02 (2.76 to 3.36) | 0.17 (0.03 to 0.3) |
| **Gallbladder and biliary tract cancer** | 6765.16 (5584.68 to 7769.42) | 11506.74 (9142.62 to 13696.41) | 0.7 | 0.51 (0.42 to 0.58) | 0.59 (0.47 to 0.7) | 0.48 (0.43 to 0.52) |
| **Other pharynx cancer** | 3859.29 (3496.41 to 4195.12) | 12566.6 (11227.54 to 14704.98) | 2.26 | 0.29 (0.26 to 0.31) | 0.64 (0.58 to 0.75) | 2.54 (2.42 to 2.66) |
| **Multiple myeloma** | 5336.02 (4770.64 to 6232.02) | 14520.06 (11284.42 to 17273.61) | 1.72 | 0.4 (0.36 to 0.47) | 0.75 (0.58 to 0.89) | 1.88 (1.56 to 2.21) |
| **Eye cancer** | 17144.2 (12931.33 to 22172.17) | 33146.88 (22602.23 to 46950.47) | 0.93 | 1.28 (0.97 to 1.66) | 1.7 (1.16 to 2.41) | 0.9 (0.81 to 0.98) |
| **Larynx cancer** | 11476.42 (8562.72 to 12937.06) | 19433.31 (16289.07 to 23227.66) | 0.69 | 0.86 (0.64 to 0.97) | 1 (0.84 to 1.19) | 0.29 (0.22 to 0.36) |
| **Mesothelioma** | 1306.6 (1146.21 to 1796.64) | 2488.63 (2226.15 to 2817.95) | 0.9 | 0.1 (0.09 to 0.13) | 0.13 (0.11 to 0.14) | 0.77 (0.71 to 0.84) |
| **Neuroblastoma and other peripheral nervous cell tumors** | 697.47 (469.83 to 998.9) | 1406.26 (959.31 to 1926.65) | 1.02 | 0.05 (0.04 to 0.07) | 0.07 (0.05 to 0.1) | 0.87 (0.64 to 1.1) |
| **Other malignant neoplasms** | 102070.67 (86299.52 to 113290.47) | 216809.53 (187278.99 to 245845.38) | 1.12 | 7.63 (6.45 to 8.47) | 11.12 (9.61 to 12.61) | 1.19 (1.11 to 1.27) |

UI: uncertainty intervals. EAPC: estimated annual percentage change.
